# Supplementary material for: An engineered pathway for the biosynthesis of renewable propane
Source: PubMed Central journal article supplement (PMC4164768; doi:10.1038/ncomms5731), 2014-09-02
Supplement: ncomms5731-s1.pdf [file ncomms5731-s1.pdf]

## SUPPLEMENTARY INFORMATION

## SUPPLEMENTARY FIGURES



**Supplementary Figure 1: Fatty acid production time-course analysis of Tes4 strain.** Fatty acid production was evaluated at 80% v/v oxygen concentration with Tes4 (BL21 (DE3) pET-T4) in 2 ml gas-tight GC vials in an identical matter as propane production experiments were carried out. Samples were collected; fatty acids were extracted from the supernatant and analyzed by GC-MS using the method described in the Materials and Methods. Error bars represent standard deviation (n = 4); details of the plasmids are described in Supplementary Table 3.



**Supplementary Figure 2: Biologically produced propane and incorporation of  $^{13}\text{C}$  label.** Mass spectra from cultivation using 20g/L 40%  $^{13}\text{C}$  labeled glucose versus normal glucose. The +1 m/z fragments 41 and 45 which are more abundant in the  $^{13}\text{C}$  sample are highlighted in red.



**Supplementary Figure 3: Propane production time-course analysis of Pro strain.** Propane production was done at atmospheric levels of oxygen with Pro (BL21 (DE3) pET-TPC4; pCDF-ADO; pACYC-petF). Error bars represent standard deviation (n = 4); details of the plasmids are described in Supplementary Table 3.



**Supplementary Figure 4: Metabolic by-product production time-course analysis of Pro and Tes4Car strains.** (A) Butyrate and (B) butanol production under atmospheric oxygen levels was evaluated, using Pro strain (BL21 (DE3) pET-TPC4; pCDF-ADO; pACYC-petF) and Tes4Car (BL21 (DE3) pET-TPC4). Strain Tes4Car was lacking ADO and petF enzymes. Error bars represent standard deviation (n = 4); details of the plasmids are described in Supplementary Table 3.



**Supplementary Figure 5: The effect of increased oxygen concentration on propane production and cell density of Pro strain. (A)** Propane production was evaluated in 2 ml gas-tight vials using Pro strain (BL21 (DE3) pET-TPC4; pCDF-ADO; pACYC-petF) and different oxygen concentration (21, 51, 80 and 100% v/v). **(B)** Cell density was measured at 600 nm from the same samples (the represented values are multiplied with the dilution rate). Error bars represent standard deviation (n = 4); details of the plasmids are described in Supplementary Table 3.



**Supplementary Figure 6: The effect of increased reaction headspace on propane production time of Pro strain.** Propane production was evaluated in 160 ml serum bottles instead of 2 ml vial with an increased incubation time in a time course analysis using Pro strain (BL21 (DE3) pET-TPC4; pCDF-ADO; pACYC-petF). Error bars represent standard deviation (n = 4); details of the plasmids are described in Supplementary Table 3.



**Supplementary Figure 7: Effect of reaction vial headspace regeneration on propane production of Pro strain.** Vials opened and resealed at one-hour intervals, with and without blowing the culture with air, followed by 1 h incubation and propane quantitation using Pro strain (BL21 (DE3) pET-TPC4; pCDF-ADO; pACYC-petF). Error bars represent standard deviation (n = 4); details of the plasmids are described in Supplementary Table 3.





**Supplementary Figure 8: The effect of increased cell concentration on propane production of Pro strain.** Propane production was evaluated in 2 ml gas-tight vials using Pro strain (BL21 (DE3) pET-TPC4; pCDF-ADO; pACYC-petF) and different cell concentration (1, 2.5, 5 and 10 times concentrated). Cells were centrifuged and re-suspended with production media, prior to sealing in gas-tight vials. Error bars represent standard deviation (n = 4); details of the plasmids are described in Supplementary Table 3.



**Supplementary Figure 9: Propane production time-course analysis of CarAdo strain.** Propane was produced by feeding butyrate under atmospheric oxygen levels, using CarAdo strain (BL21 (DE3) pET28-ADO; pCDF-PPC). Error bars represent standard deviation (n = 4); details of the plasmids are described in Supplementary Table 3.



**Supplementary Figure 10: The effect of oxygen concentration on butyric acid production of Tes4 strain.** Butyrate production was evaluated at 21, 51 and 80% v/v oxygen concentrations with Tes4 (BL21 (DE3) pET-T4) in 2 ml gas-tight GC vials with 3h incubation time in an identical matter as propane production experiments were carried out. Samples were collected; butyrate was extracted from the supernatant and analyzed by GC-MS using the method described in the Materials and Methods. Error bars represent standard deviation (n = 4); details of the plasmids are described in Supplementary Table 3.



**Supplementary Figure 11: Propane production of CarAdo strain fed with butyrate under aerobic and anaerobic conditions.** Propane production was evaluated at 23 and 30°C under normal and nitrogen atmosphere (0% O<sub>2</sub>), using CarAdo strain (BL21 (DE3) pET28-ADO; pCDF-PPC). Error bars represent standard deviation (n = 4); details of the plasmids are described in Supplementary Table 3.



**Supplementary Figure 12: The effect of KatE overexpression on propane production.** Propane production was evaluated with Pro (BL21 (DE3) pET-TPC4; pCDF-ADO; pACYC-petF) and ProK (BL21 (DE3) pET-TPC4; pCDF-ADO; pACYC-petF-katE) strains under 21% v/v and 80% v/v oxygen concentrations. Error bars represent standard deviation (n = 4); details of the plasmids are described in Supplementary Table 3.



**Supplementary Figure 13: The effect of *fpr* and *KatE* overexpression on propane production.** Propane production was evaluated with Pro (BL21 (DE3) pET-TPC4; pCDF-ADO; pACYC-petF) and ProFK (BL21 (DE3) pET-TPC4; pCDF-ADO; pACYC-petF-*fpr*-*katE*) strains under 21% v/v and 80% v/v oxygen concentrations. Error bars represent standard deviation (n = 4); details of the plasmids are described in Supplementary Table 3.



**Supplementary Figure 14: The effect of KatE overexpression on propane production.** Propane production was evaluated with ProF (BL21 (DE3) pET-TPC4; pCDF-ADO; pACYC-petF-fpr) and ProFK (BL21 (DE3) pET-TPC4; pCDF-ADO; pACYC-petF-fpr-katE) strains under 21% v/v and 80% v/v oxygen concentrations. Error bars represent standard deviation (n = 4); details of the plasmids are described in Supplementary Table 3.



**Supplementary Figure 15: Propane production time-course analysis of ProFK strain.** Propane was produced by overexpressing Fpr and KatE under atmospheric oxygen levels, using ProFK strain (BL21 (DE3) pET-TPC4; pCDF-ADO; pACYC-petF-fpr-katE). Error bars represent standard deviation (n = 4); details of the plasmids are described in Supplementary Table 3.





**Supplementary Figure 16: Propane and butanol production of aldehyde reductase knock-out with *fpr* and *katE* overexpression.** (A) Propane and (B) butanol production was evaluated with ProFK (BL21 (DE3) pET-TPC4; pCDF-ADO; pACYC-petF-fpr-katE) and ProFKΔA (BL21 (DE3)  $\Delta$ yqhD  $\Delta$ ahr pET-TPC4; pCDF-ADO; pACYC-petF-fpr-katE) strains under 21% v/v oxygen concentration at 30, 90 and 180 min time points. Error bars represent standard deviation (n = 4); details of the plasmids are described in Supplementary Table 3.



**Supplementary Figure 17: Biologically produced heptane and incorporation of <sup>13</sup>C label.** (A) Overlay GC-MS chromatogram of heptane standard and the product peak of HepFKΔA (BL21 (DE3) ΔyqhD Δahr pET-TPC3; pCDF-ADO; pACYC-petF-fpr-katE) strain. The mass spectra were filtered for m/z 57 using standard and HepFKΔA (Hep+fpr+katE ΔyqhD Δahr) strain. The parameters of the analysis are described in the Materials and Methods section. (B) Incorporation of <sup>13</sup>C label in heptane from glucose: Ion fragmentation pattern of heptane (M=100.2 g mol<sup>-1</sup>) produced using TB medium with 20g/L 40% <sup>13</sup>C labeled glucose versus normal glucose. The +1 m/z fragments 44, 58 and 72 which are more abundant in the <sup>13</sup>C sample are highlighted in red.



**Supplementary Figure 18: The effect of *fpr* and *KatE* overexpression on heptane production.** Heptane production was evaluated with Hep (BL21 (DE3) pET-TPC3; pCDF-ADO; pACYC-petF), HepK (BL21 (DE3) pET-TPC3; pCDF-ADO; pACYC-petF-katE) and HepFK (BL21 (DE3) pET-TPC3; pCDF-ADO; pACYC-petF-fpr-katE) strains under 21% v/v and 80% v/v oxygen concentrations. Error bars represent standard deviation (n = 4); details of the plasmids are described in Supplementary Table 3.



**Supplementary Figure 19: The effect of KatE and fpr co-expression on heptane production.** Heptane production was evaluated with HepF (BL21 (DE3) pET-TPC3; pCDF-ADO; pACYC-petF-fpr) and HepFK (BL21 (DE3) pET-TPC3; pCDF-ADO; pACYC-petF-fpr-katE) strains under 21% v/v and 80% v/v oxygen concentrations. Error bars represent standard deviation (n = 4); details of the plasmids are described in Supplementary Table 3.



**Supplementary Figure 20: The effect of aldehyde reductase knockout on heptane production.** Heptane production was evaluated with HepFK (BL21 (DE3) pET-TPC3; pCDF-ADO; pACYC-petF-fpr-katE) and HepFKΔΔ (BL21 (DE3) ΔyqhD Δahr pET-TPC3; pCDF-ADO; pACYC-petF-fpr-katE) strains under 21 and 80% v/v oxygen concentrations. Error bars represent standard deviation (n = 4); details of the plasmids are described in Supplementary Table 3.

# SUPPLEMENTARY TABLES

**Supplementary Table 1: Biologically produced hydrocarbons and properties of gaseous fuels**

| <b>Biologically relevant alkanes/alkenes</b> | <b>Physical state at STP</b> | <b>Boiling point</b> | <b>References</b> |
|----------------------------------------------|------------------------------|----------------------|-------------------|
| Methane                                      | Gas                          | -161°C               | 1                 |
| Ethane                                       | Gas                          | -89°C                | 2                 |
| Propane                                      | Gas                          | -42°C                | <b>This study</b> |
| Pentane                                      | Liquid                       | 36°C                 | 3                 |
| Heptane                                      | Liquid                       | 98°C                 | <b>This study</b> |
| Octane                                       | Liquid                       | 121°C                | 4                 |
| Nonane                                       | Liquid                       | 151°C                | 4                 |
| Undecane                                     | Liquid                       | 196°C                | 5                 |
| Dodecane                                     | Liquid                       | 216°C                | 4                 |
| Tridecane                                    | Liquid                       | 235°C                | 4, 5, 6, 7        |
| Tetradecane                                  | Liquid                       | 254°C                | 4                 |
| Pentadecane                                  | Liquid                       | 271°C                | 6                 |
| Pentadecene                                  | Liquid                       | 268°C                | 5, 6, 7           |
| Hexadecane                                   | Liquid                       | 287°C                | 6                 |
| Hexadecene                                   | Liquid                       | 285°C                | 6                 |
| Heptadecane                                  | Solid                        | 316°C                | 6                 |
| Heptadecene                                  | Liquid                       | 300°C                | 5, 6, 7           |

| <b>Fuel</b>                   | <b>Ideal work of liquefaction<br/>(kJ/kg)</b> | <b>Higher heating value<br/>(kJ/kg)</b> | <b>Work to liquefy per available energy<br/>% (J/J)</b> |
|-------------------------------|-----------------------------------------------|-----------------------------------------|---------------------------------------------------------|
| H <sub>2</sub>                | 12019                                         | 141800                                  | 8.48                                                    |
| CH <sub>4</sub>               | 1091                                          | 55530                                   | 1.97                                                    |
| C <sub>3</sub> H <sub>8</sub> | 140.4                                         | 50322                                   | 0.28                                                    |

The ideal work of liquefaction, values obtained from Barron et al.<sup>8</sup> (Table 3.1, p. 63), is a theoretical estimate of the amount of work that is needed to liquefy the gas. The higher heating value is an estimate of the total energy released upon complete combustion<sup>9</sup>. The theoretical work required to liquefy the gas is compared to the total energy available upon combustion.

**Supplementary Table 2: List of bacterial strains.** The abbreviations containing Pro and Hep refer to strains producing propane, heptane respectively; Tes4 is producing butyrate; TesCar is producing butanol; CarAdo is referred to the strain used in the butyrate feeding study for propane production.

| <b>Strain</b> | <b>Host</b>                          | <b>Plasmids</b>                         |
|---------------|--------------------------------------|-----------------------------------------|
| Tes3          | <i>E. coli</i> BL21 (DE3)            | pET-T3                                  |
| Tes4          | <i>E. coli</i> BL21 (DE3)            | pET-T4                                  |
| Tes4Car       | <i>E. coli</i> BL21 (DE3)            | pET-TPC4                                |
| Pro           | <i>E. coli</i> BL21 (DE3)            | pET-TPC4; pCDF-ADO; pACYC-petF          |
| ProF          | <i>E. coli</i> BL21 (DE3)            | pET-TPC4; pCDF-ADO; pACYC-petF-fpr      |
| ProK          | <i>E. coli</i> BL21 (DE3)            | pET-TPC4; pCDF-ADO; pACYC-petF-katE     |
| ProFK         | <i>E. coli</i> BL21 (DE3)            | pET-TPC4; pCDF-ADO; pACYC-petF-fpr-katE |
| ProFΔA        | <i>E. coli</i> BL21 (DE3) ΔyqhD Δahr | pET-TPC4; pCDF-ADO; pACYC-petF-fpr      |
| ProKΔA        | <i>E. coli</i> BL21 (DE3) ΔyqhD Δahr | pET-TPC4; pCDF-ADO; pACYC-petF-katE     |
| ProFKΔA       | <i>E. coli</i> BL21 (DE3) ΔyqhD Δahr | pET-TPC4; pCDF-ADO; pACYC-petF-fpr-katE |
| CarAdo        | <i>E. coli</i> BL21 (DE3)            | pET28-ADO; pCDF-PPC                     |
| Hep           | <i>E. coli</i> BL21 (DE3)            | pET-TPC3; pCDF-ADO; pACYC-petF          |
| HepF          | <i>E. coli</i> BL21 (DE3)            | pET-TPC3; pCDF-ADO; pACYC-petF-fpr      |
| HepK          | <i>E. coli</i> BL21 (DE3)            | pET-TPC3; pCDF-ADO; pACYC-petF-katE     |
| HepFK         | <i>E. coli</i> BL21 (DE3)            | pET-TPC3; pCDF-ADO; pACYC-petF-fpr-katE |
| HepFΔA        | <i>E. coli</i> BL21 (DE3) ΔyqhD Δahr | pET-TPC3; pCDF-ADO; pACYC-petF-fpr      |
| HepKΔA        | <i>E. coli</i> BL21 (DE3) ΔyqhD Δahr | pET-TPC3; pCDF-ADO; pACYC-petF-katE     |
| HepFKΔA       | <i>E. coli</i> BL21 (DE3) ΔyqhD Δahr | pET-TPC3; pCDF-ADO; pACYC-petF-fpr-katE |

**Supplementary Table 3: Detailed plasmid list used for the experiments**

| Plasmid name        | Protein | Organism                   | Protein | Organism                       | Protein | Organism              |
|---------------------|---------|----------------------------|---------|--------------------------------|---------|-----------------------|
| pET-T3              | TE3     | Anaerococcus tetradius     |         |                                |         |                       |
| pET-T4              | TE4     | Bacteroides fragilis       |         |                                |         |                       |
| pET-TPC3            | TE3     | Anaerococcus tetradius     | Sfp     | Bacillus subtilis (strain 168) | CAR     | Mycobacterium marinum |
| pET-TPC4            | TE4     | Bacteroides fragilis       | Sfp     | Bacillus subtilis (strain 168) | CAR     | Mycobacterium marinum |
| pET28-ADO           | ADO     | Prochlorococcus marinus    |         |                                |         |                       |
| pCDF-ADO            | ADO     | Prochlorococcus marinus    |         |                                |         |                       |
| pCDF-PPC            | PetF    | Synechocystis sp. PCC 6803 | Sfp     | Bacillus subtilis (strain 168) | CAR     | Mycobacterium marinum |
| pACYC-PetF          | PetF    | Synechocystis sp. PCC 6803 |         |                                |         |                       |
| pACYC-PetF-KatE     | PetF    | Synechocystis sp. PCC 6803 | KatE    | Escherichia coli               |         |                       |
| pACYC-PetF-Fpr-KatE | PetF    | Synechocystis sp. PCC 6803 | Fpr     | Escherichia coli               | KatE    | Escherichia coli      |



**Supplementary Table 4: Optimization of the culture conditions.** Various culture conditions and expression parameters were optimized for propane production using the strain Pro (BL21 (DE3) pET-TPC4; pCDF-ADO; pACYC-petF). The selected default conditions (right column) were used in the assays for analyzing the performance of the propane and heptane pathways in this study. The inducer concentration and cell density (\*) varied between some experimental setups.

| <b>Conditions</b>                                | <b>Tested parameters</b>   | <b>Optimal/Default</b> |
|--------------------------------------------------|----------------------------|------------------------|
| Cell density at induction (OD <sub>600nm</sub> ) | 0.25, 0.5, 1, 2            | 0.5-0.9 *              |
| IPTG concentration                               | 0.05mM, 0.25mM, 0.5mM, 1mM | 0.25-1 *               |
| Induction temperature                            | 21°C, 30°C, 37°C           | 30°C                   |
| Induction time                                   | 2h, 4h, 6h                 | 4h                     |
| Glucose concentration                            | 5g/L, 10g/L, 25g/L         | 20g/L                  |
| Reaction culture volume in 2.1ml vial            | 0.25ml, 0.5ml, 1ml         | 0.5ml                  |
| Reaction cell density (concentration)            | 1x, 2x, 5x, 10x            | 4x                     |
| Reaction temperature                             | 21°C, 30°C, 37°C           | 21°C                   |
| Reaction time                                    | 1h, 2h, 4h, 6h, 19h        | 3h                     |

**Supplementary Table 5: Oligonucleotide primers used in the experiments.** Please refer to Materials and Methods for more details

| <b>Primer</b> | <b>Sequence</b>                                                         |
|---------------|-------------------------------------------------------------------------|
| Tes3_FW       | ACTTCACCATGGGCTAAGGTACCTAATTAATTAATAAGGAG                               |
| Tes3_RE       | ACCATCAAGCTTTTAAATTAATTACACGTTAGTTTTAATTTCCCAAAC                        |
| Tes4_RE       | ACCATCAAGCTTTTAAATTAATTAACAAATTTCACTTTGGCGC                             |
| Yqhd_del_FW   | GCAGATCGTTCTCTGCCCTCATATTGGCCAGCAAAGGGAGCAAGTAATGATTCCGGGGATCCGTCGACC   |
| Yqhd_del_RE   | CGAAAACGAAAGTTTGAGGCGTAAAAGCTTAGCGGGCGGCTTCGTATATTGTAGGCTGGAGCTGCTTCG   |
| Ahr_del_FW    | GCCCTGCCATGCTCTACACTTCCCAAACAACACCAGAGAAGGACCAAAAAGTGTAGGCTGGAGCTGCTTCG |
| Ahr_del_RE    | GAATATGTGCGAAAGAGGGCAGCGCCTCAGATCAGCGCTGCGAATGATTTATTCGGGGATCCGTCGACCTG |
| KatE_FW       | ATATCCTAGGTCATGAGGAGGTTTGAATGTGCGAACATAACGAAAAGAACCCAC                  |
| KatE_RE       | ATATCCTAGGTCAGGCAGGAATTTGTCAATCTTAGGAA                                  |
| Fpr_FW        | AATATTAAGCTTTAAATGATTGAAGGAGGAAAAATGGCTGATTGGGTAACAGGCAAAGTC            |
| Fpr_RE        | AATATTCCTAGGTTACCAGTAATGCTCCGCTGTCATATGG                                |
| ADO_BamHI_FW  | ATATGGATCCGCGCGGAGCCA                                                   |
| ADO_AvrII_RE  | ATATCCTAGGTTAAGAAACCAGGGCCGCTGCG                                        |

## SUPPLEMENTARY REFERENCES

1. Thauer, R. K. Biochemistry of methanogenesis: a tribute to Marjory Stephenson. 1998 Marjory Stephenson Prize Lecture. *Microbiology* **144**, 2377-2406.
2. Belay, N. & Daniels, L. Production of ethane, ethylene, and acetylene from halogenated hydrocarbons by methanogenic bacteria. *Appl. Environ. Microbiol.* **53**, 1604-1610 (1987).
3. Blazeck, J., L. Liu, Knight, R. & Alper, H. S. Heterologous production of pentane in the oleaginous yeast *Yarrowia lipolytica*. *J. Biotechnol.* **165**, 184-194 (2013).
4. Choi, Y. J. & S. Y. Lee. Microbial production of short-chain alkanes. *Nature* **502**, 571-574 (2013).
5. Akhtar, M. K., Turner, N. J. & Jones, P.R. Carboxylic acid reductase is a versatile enzyme for the conversion of fatty acids into fuels and chemical commodities. *Proc. Natl. Acad. Sci. U.S.A.* **110**, 87-92 (2013).
6. Howard, T. P. et al. Synthesis of customized petroleum-replica fuel molecules by targeted modification of free fatty acid pools in *Escherichia coli*. *Proc. Natl. Acad. Sci. U.S.A.* **110**, 7636-7641 (2013).
7. Schirmer, A., Rude, M. , Li, X., Popova, E. & del Cardayre, S. Microbial biosynthesis of alkanes. *Science* **329**, 559-562 (2010).
8. Barron, R.F. *Cryogenic Systems*, 2<sup>nd</sup> ed 53 (Oxford University Press, New York, 1985).
9. Burgess, D.R. Thermochemical data. In: Linstrom, P.J., Mallard, W.G. (eds.) *NIST Chemistry WebBook, NIST Standard Reference Database Number 69* (National Institute of Standards and Technology, Gaithersburg MD, 20899, <http://webbook.nist.gov>, 2012).
